# Supplementary material
Source: PubMed Central journal article supplement (PMC4741328)
Supplement: supp_pp.15.00298_PP2015-00298R1_Supplemental_Material.pdf [file supp_pp.15.00298_PP2015-00298R1_Supplemental_Material.pdf]

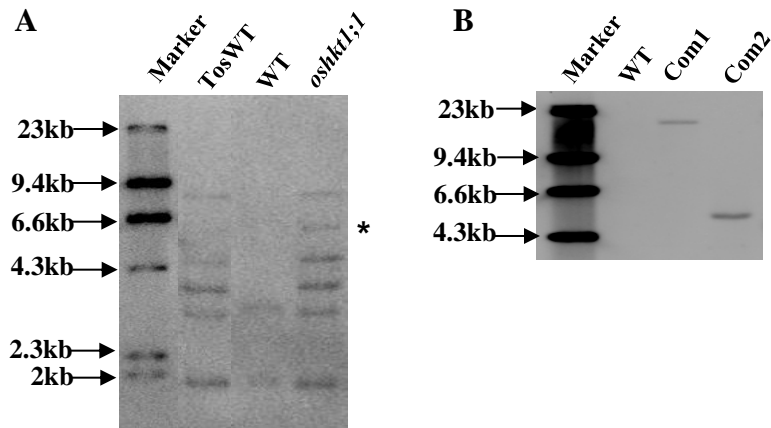

**Supplemental Figure S1.** Southern-blot analysis for the plant materials used in this study.

**A**, Genomic DNA was digested with restriction enzyme *Bam*HI, a fragment of *Tos17* gene was used as probe. The original variety Nipponbare (WT), had two copies of *Tos17*. The *oshkt1;1* mutant had an additional copy with approximately 6-kb band (asterisk) as compared with TosWT.

**B**, Southern blot analysis of the copy number in transgenic plants with *OsHKT1;1-COM* (Com1 and Com2) and WT plants. Genomic DNA was digested with restriction enzyme *Hind*III, the DNA fragment of *Hygromycin* gene was used as probe.

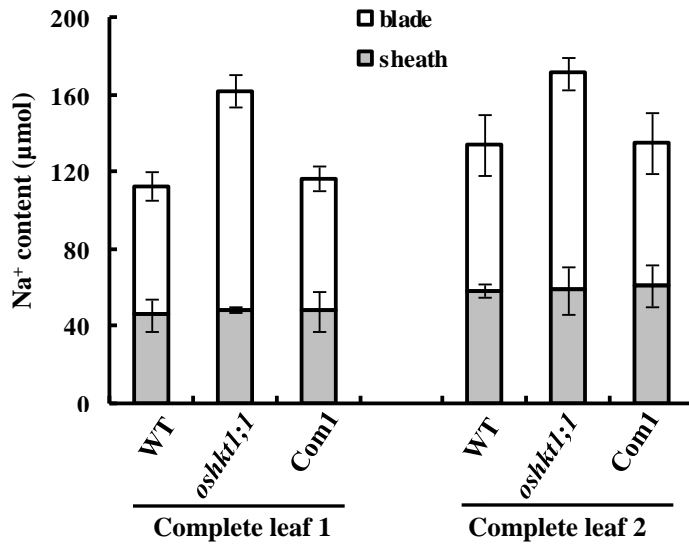

**Supplemental Figure S2.** The Na<sup>+</sup> content in the leaf sheaths and leaf blades.

The Na<sup>+</sup> content in the sheath and the blade of complete leaves 1 and 2. The hydroponically grown seedlings were treated with 100 mM NaCl for 7 d, and the leaves were harvested for Na<sup>+</sup> content assay. Error bars represent SE (n=4).

**Supplemental Table S1.** The raw data of Na<sup>+</sup> content in the leaf sheaths and leaf blades

|                 |                 | sheath (µmol) | blade (µmol)  | sheath/blade |
|-----------------|-----------------|---------------|---------------|--------------|
| Complete leaf 1 | WT              | 45.96 ± 8.54  | 66.82 ± 6.99  | 0.68 ± 0.031 |
|                 | <i>oshkt1;1</i> | 48.64 ± 1.62  | 113.4 ± 8.35  | 0.42 ± 0.022 |
|                 | Com             | 47.91 ± 10.01 | 68.64 ± 6.26  | 0.69 ± 0.024 |
| Complete leaf 2 | WT              | 58.56 ± 3.59  | 75.19 ± 15.50 | 0.77 ± 0.046 |
|                 | <i>oshkt1;1</i> | 58.76 ± 12.13 | 112.3 ± 8.25  | 0.52 ± 0.057 |
|                 | Com             | 61.08 ± 11.18 | 73.79 ± 15.57 | 0.82 ± 0.063 |

**A**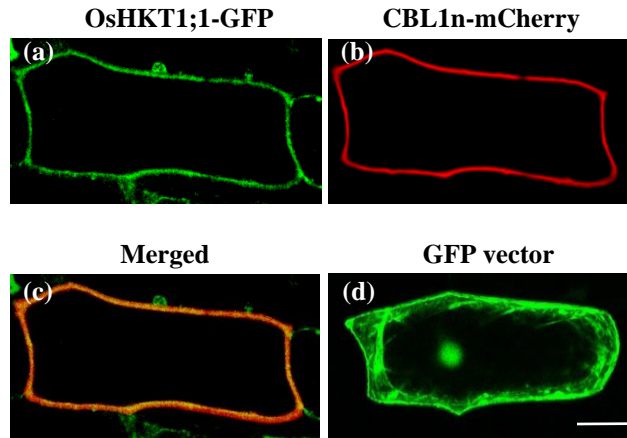**B**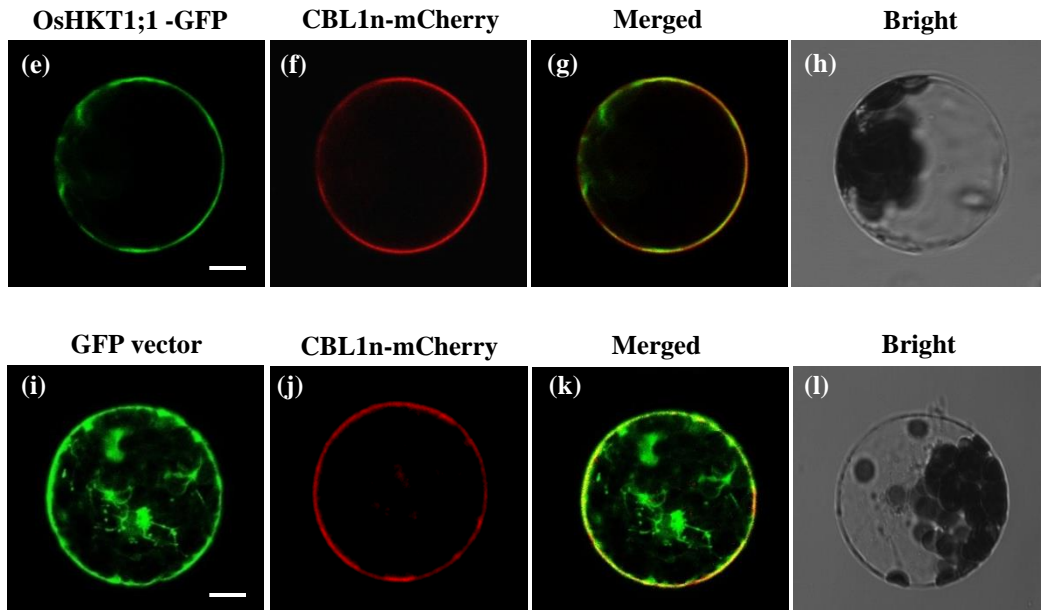**Supplemental Figure S3.** OsHKT1;1 localization in the cell.

**A**, Onion epidermal cells were transformed with the plasmid combinations indicated. Individual panels show (a) an epidermal cell expressed OsHKT1;1-GFP (green); (b) the same cell expressed PM-maker CBL1n-mcherry (red); (c) merged images of (a) and (b); (d) GFP vector-expressing cell. Bar=25  $\mu$ m.

**B**, Subcellular localization of OsHKT1;1-GFP in *Arabidopsis* mesophyll protoplasts. (e) to (h), OsHKT1;1-GFP protein was transiently co-expressed with CBL1n-mcherry in a protoplast. (i) to (l), GFP vector was co-expressed with CBL1n-mcherry. Bars=10  $\mu$ m.

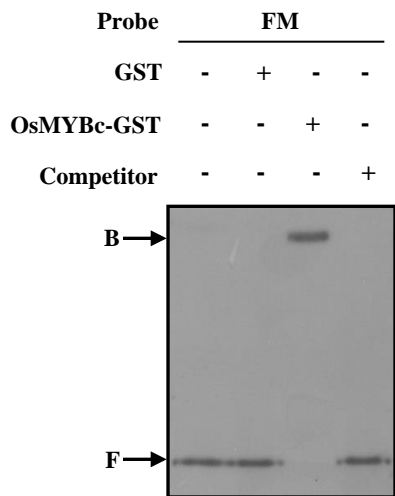

**Supplemental Figure S4.** OsMYBc binds to the promoter of *OsHKT2;1*  
 EMSA shows the GST-OsMYBc protein binding with the fragment FM (-457 to -285) of *OsHKT2;1* promoter *in vitro*.

**Supplemental Table S2.** The raw data of Na<sup>+</sup> content in phloem sap.

|                 | Na <sup>+</sup> (mM) | glutamine (mM) | Na <sup>+</sup> :glutamine | Dry weight (g) |
|-----------------|----------------------|----------------|----------------------------|----------------|
| WT              | 1.27 ± 0.13          | 0.151 ± 0.019  | 8.49 ± 0.38                | 0.41 ± 0.02    |
| <i>oshkt1;1</i> | 0.79 ± 0.08          | 0.130 ± 0.011  | 6.44 ± 0.48                | 0.44 ± 0.033   |
| Com1            | 1.34 ± 0.15          | 0.149 ± 0.013  | 9.01 ± 0.53                | 0.44 ± 0.027   |

**Supplemental Table S3.** Positive interactions from yeast One Hybrid screen

| <b>Locus identification no.</b> | <b>Description</b>                             | <b>The number of clones identified</b> |
|---------------------------------|------------------------------------------------|----------------------------------------|
| LOC_Os06g50600                  | Putative protein                               | 1                                      |
| LOC_Os05g21180                  | Putative protein                               | 1                                      |
| LOC_Os02g07790                  | Protein kinase                                 | 1                                      |
| LOC_Os05g35740                  | Subtilisin N-terminal Region family protein    | 2                                      |
| LOC_Os11g01510                  | Ubiquitin-activating enzyme                    | 2                                      |
| LOC_Os02g35840                  | Expressed protein                              | 1                                      |
| LOC_Os01g49690                  | Putative protein                               | 2                                      |
| LOC_Os09g12770                  | Myb-like DNA-binding domain containing protein | 7                                      |
| LOC_Os04g50864                  | Expressed protein                              | 1                                      |
| LOC_Os01g21180                  | Translation machinery-associated protein 20    | 1                                      |
| LOC_Os06g35814                  | Putative protein                               | 1                                      |
| LOC_Os12g42550                  | Methyl-CpG binding domain containing protein   | 1                                      |
| LOC_Os11g05540                  | RhoGAP domain containing protein               | 2                                      |
| LOC_Os08g03640                  | 60S acidic ribosomal protein                   | 1                                      |
| LOC_Os02g10470                  | EF hand family protein                         | 1                                      |
| LOC_Os05g06310                  | 60S ribosomal protein                          | 1                                      |

**Supplemental Table S4.** *HKT* genes containing MYB-CC cis-element binding region in their promoters.

| <b>Nucleotide<br/>Accession No.</b> | <b>Description</b> | <b>No. of MYB<br/>cis-element</b> | <b>Position of MYB<br/>cis-element</b> |
|-------------------------------------|--------------------|-----------------------------------|----------------------------------------|
| AJ491816                            | <i>OsHKT1;1</i>    | 3                                 | -76, -276, -1477                       |
| AJ491853                            | <i>OsHKT1;4</i>    | 1                                 | -900                                   |
| AK108663                            | <i>OsHKT1;5</i>    | 2                                 | -2183, -2227                           |
| QB061311                            | <i>OsHKT2;1</i>    | 1                                 | -395                                   |
| U16709                              | <i>TaHKT2;1</i>    | 1                                 | -1018                                  |
| HQ845286                            | <i>ZmHKT-like</i>  | 1                                 | -575                                   |

Os, *Oryza sativa*, Ta, *Triticum aestivum*, Zm, *Zea mays*.

**Supplemental Table S5.** The primers used in this study.

| <b>Primer name</b>         | <b>Primer sequence (5'-3')</b>      |
|----------------------------|-------------------------------------|
| <i>OsHKT1;1-F</i>          | GATCCCGCAGATTCTAGCAG                |
| <i>OsHKT1;1-R</i>          | GGCAATTCGGATTTTCAGTG                |
| <i>tail 6</i>              | AGGTTGCAAGTTAGTTAAGA                |
| <i>OsHKT1;1-RT-F</i>       | TTCACCACTCTTGCGGCTATG               |
| <i>OsHKT1;1-RT-R</i>       | TGTTTGTAGCCAGTCTCCCCAG              |
| <i>OsHKT1;5-RT-F</i>       | CCACCTTTTCCCTTTTCCATGC              |
| <i>OsHKT1;5-RT-R</i>       | GGTCTTCATCGGCAGAGCTTT               |
| <i>OsHKT2;1-RT-F</i>       | CACAGTCTCCTCGTTTGCAG                |
| <i>OsHKT2;1-RT-R</i>       | GCAAGAATCTGGCCGATGAA                |
| <i>OsUBQ5-F</i>            | ACCACTTCGACCGCCACTACT               |
| <i>OsUBQ5-R</i>            | ACGCCTAAGCCTGCTGGTT                 |
| <i>18S rRNA-F</i>          | CTACGTCCCTGCCCTTTATACA              |
| <i>18S rRNA-R</i>          | ACACTTCACCGGACCATTCAA               |
| <i>Com-OsHKT1;1-F</i>      | CGGGATCCTCCATTCTCTCTACCAACCTCAGAT   |
| <i>Com-OsHKT1;1-R</i>      | GCTCTAGATCATTTTCAGGATGAACTCCTTGAGCC |
| <i>GFP-OsHKT1;1-F</i>      | GCGGATCCATGCATCCACCAAGTTTAGTGCT     |
| <i>GFP-OsHKT1;1-R</i>      | GCGGATCCTTTCAGGATGAACTCCTTGA        |
| <i>Pro-OsHKT1;1-2120-F</i> | CGGGATCCTCCTGGCAAAATGCTGGTTGA       |
| <i>Pro-OsHKT1;1-1623-F</i> | CGGGATCCCATGTCATCATTCATGCAAAAATC    |
| <i>Pro-OsHKT1;1-1126-F</i> | CGGGATCCACGTGCTAACAAGTCGAGATAAAAATC |
| <i>Pro-OsHKT1;1-629-F</i>  | CGGGATCCTGAACTGGGGTCTGAACTGAACTG    |
| <i>Pro-OsHKT1;1-R</i>      | CATGCCATGGAACTTGGTGGATGCATTCTTC     |
| <i>Pro-RD29A-F</i>         | CGGGATCCCCCGACCGACTACTAATAATAGTA    |
| <i>Pro-RD29A-R</i>         | CATGCCATGGGGTCCAAAGATTTTTTTCTTTCC   |
| <i>Bait-F</i>              | ACGCGTCGACTGAACTGGGGTCTGAACTGAACTG  |
| <i>Bait-R</i>              | CCGCTCGAGTTGGGCTTATAGAAGGTGGTA      |
| <i>Tos probe-F</i>         | GCTACCCGTTCTTGACTAT                 |
| <i>Tos probe-R</i>         | CTGAAATCGGAGCACTGACA                |
| <i>Hyg probe-F</i>         | TTCCACTATCGGCGAGTACT                |
| <i>Hyg probe-R</i>         | GGTGTCACGTTGCAAGACCT                |
| <i>CBL1n-F</i>             | GGACTAGTATGGGCTGCTTCCACTCAA         |
| <i>CBL1n-R</i>             | CCGCTCGAGTTACTTGTACAGCTCGTCCA       |



**Supplemental Table S5.** The primers used in this study (continued) .

| <b>Primer name</b>     | <b>Primer sequence (5'-3')</b>      |
|------------------------|-------------------------------------|
| <i>GFP-OsMYBc-F</i>    | CGCCATGGATGGAATTAGGTGGCAACAATATGG   |
| <i>GFP-OsMYBc-R</i>    | CGCCATGGCTAATGACCTGAGTAGGACATGGAAC  |
| <i>GST-OsMYBc-F</i>    | CCCAAGCTTATGGAATTAGGTGGCAACAATATGG  |
| <i>GST-OsMYBc-R</i>    | GGGGTACCCTAATGACCTGAGTAGGACATGGAAC  |
| <i>F1-L</i>            | TGAACTGGGGTCTGAAC                   |
| <i>F1-R</i>            | CTTCTTCCTGAGCAGTC                   |
| <i>F2-L</i>            | GGAATCACATAGACCAATC                 |
| <i>F2-R</i>            | AGAGTCCCAAGTGTTTGG                  |
| <i>F3-L</i>            | AAAAAGTACACACCACC                   |
| <i>F3-R</i>            | AAACTTGGTGGATGCA                    |
| <i>FM-L</i>            | CGCTGAGCAGGTAATCATTAG               |
| <i>FM-R</i>            | CGGATTCTCAGAAGTGTAAC                |
| <i>ChIP-I-F</i>        | GTATGGTTTGAAATGATATCT               |
| <i>ChIP-I-R</i>        | CATGTGGGCTAATATAGTCCT               |
| <i>ChIP-II-F</i>       | TGCTGGTTTCCTTGCTCTGAAG              |
| <i>ChIP-II-R</i>       | CACAGCGCAAGGATTATATGTTA             |
| <i>2715BP</i>          | GTTACGTCCTGTAGAA ACCCAA             |
| <i>OsMYBc-F</i>        | AATCCAACCTGGCTGCAAG                 |
| <i>OsMYBc-R</i>        | TTGAAAGCCAAAAATGGTGG                |
| <i>OsMYBc-RT-F</i>     | CAAATGAGCTGCACGAACGA                |
| <i>OsMYBc-RT-R</i>     | GAGGGGTCAGTTCTTTTCGGA               |
| <i>Point1-F</i>        | TTCCACAGCCACAAAAGCGGCTAACTAAGGTACCA |
| <i>Point1-R</i>        | TGGTACCTTAGTTAGCCGCTTTTGTGGCTGTGGAA |
| <i>Point2-F</i>        | TTAGAAACCTACCAAAGCGGCCATTGAAACACACT |
| <i>Point2-R</i>        | AGTGTGTTTCAATGGCCGCTTTGGTAGGTTTCTAA |
| <i>pGADT7-OsMYBc-F</i> | GAATTCATGGAATTAGGTGGCAACAATATGG     |
| <i>pGADT7-OsMYBc-R</i> | CTCGAGCTAATGACCTGAGTAGGACATGGAAC    |
| <i>Flag-OsMYBc-F</i>   | CGGAATTCATGGAATTAGGTGGCAACAATATGG   |
| <i>Flag-OsMYBc-R</i>   | TGCTCTAGACTAATGACCTGAGTAGGACATGGAAC |

## Supplemental Methods

### Localization of OsHKT1;1

The localization assay in onion epidermal cells was performed as described by Campo et al. (2014). To construct the OsHKT1;1-GFP fusion expression vector, the full-length coding sequence of *OsHKT1;1* was cloned from rice cDNA by using the primers *OsHKT1;1-GFP-F/OsHKT1;1-GFP-R*. The PCR product was cloned into the HBT-sGFP plasmid (Sheen's Lab). The *CBL1n* (Held et al., 2011) sequence was cloned by using the primers *CBL1n-F/CBL1n-R*, and was constructed into the pUC-18-mCherry plasmid. Two constructions were co-transformed into the *Arabidopsis* mesophyll protoplasts.

*Arabidopsis* mesophyll protoplasts were isolated and transformed following a previous procedure (Zhang et al., 2004). Protoplasts were incubated at 23°C in the dark for at least 16 h before confocal observation.

## Reference

**Held K, Pascaud F, Eckert C, Gajdanowicz P, Hashimoto K, Corratgé-Faillie C, Offenborn JN, Lacombe B, Dreyer I, Thibaud JB, Kudla J** (2011) Calcium-dependent modulation and plasma membrane targeting of the AKT2 potassium channel by the CBL4/CIPK6 calcium sensor/protein kinase complex. *Cell Research* **21**: 1116-1130

**Zhang W, Qin C, Zhao J, Wang X** (2004) Phospholipase D $\alpha$ 1-derived phosphatidic acid interacts with ABI1 phosphatase 2C and regulates abscisic acid signaling. *Proc. Natl. Acad. Sci. USA* **101**: 9508-9513
